# Supplementary material for: Superior mechanical, electrical, dielectric, and EMI shielding properties of ethylene propylene diene monomer (EPDM) based carbon black composites
Source: Royal Society of Chemistry journal article supplement (doi:10.1039/d3ra04187e), 2023-01-01
Supplement: d3ra04187e1.pdf [file d3ra04187e1.pdf]

## Superior mechanical, electrical, dielectric, and EMI shielding properties of ethylene propylene diene monomer (EPDM) based carbon blacks' composites

Mostafizur Rahaman

Department of Chemistry, College of Science, King Saud University, P.O. Box 2455, Riyadh 11451, Saudi Arabia

Corresponding author's email: [mrahaman@ksu.edu.sa](mailto:mrahaman@ksu.edu.sa) (MR)

**Table S1.** General specification of HAF and Printex XE2 carbon blacks.

| Typical properties  | HAF Black | Printex Black | Unit              |
|---------------------|-----------|---------------|-------------------|
| Mean particle size  | 31        | 35            | nm                |
| Surface area, STSA  | 75        | 587           | m <sup>2</sup> /g |
| Surface area, CTAB  | 78        | 600           | m <sup>2</sup> /g |
| DBP absorption      | 88-102    | 350-410       | cc/100 g          |
| Volatiles at 105 °C | 1.5       | 1.0           | %                 |
